# Supplementary material for: The Antibacterial Effect of Selected Essential Oils and Their Bioactive Constituents on Pseudomonas savastanoi pv. savastanoi: Phytotoxic Properties and Potential for Future Olive Disease Control
Source: MDPI journal article supplement (doi:10.3390/microorganisms11112735), 2023-11-09
Supplement: s1 [file s1]

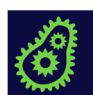

## Article

# The Antibacterial Effect of Selected Essential Oils and Their Bioactive Constituents on *Pseudomonas savastanoi* pv. *savastanoi*: Phytotoxic Properties and Potential for Future Olive Disease Control

Laura Koščak <sup>1</sup>, Janja Lamovšek <sup>2</sup>, Edyta Dermić <sup>3</sup> and Sara Godena <sup>1,\*</sup>

<sup>1</sup> Laboratory for plant protection, Department of Agriculture and Nutrition, Institute of Agriculture and Tourism, Carlo Hugues 8, 52440 Poreč, Croatia

<sup>2</sup> Agricultural Institute of Slovenia, Hacquetova ulica 17, 1000 Ljubljana, Slovenia

<sup>3</sup> Department of Plant Pathology, Division of Phytomedicine, Faculty of Agriculture, University of Zagreb, Svetošimunska cesta 25, 10000 Zagreb, Croatia

\* Correspondence: sara@iptpo.hr

## Supplementary Materials

**Table S1.** The list of antimicrobials selected for antibacterial testing against *Pseudomonas savastanoi* pv. *savastanoi* in concentrations specified.

| Group                                          | Antimicrobials               | Concentration (mg/ mL) |     |    |
|------------------------------------------------|------------------------------|------------------------|-----|----|
|                                                |                              | C1                     | C2  | C3 |
| Essential oils<br>(EOs)                        | <i>Mentha x piperita</i> L.  | Undiluted              | 40  | 50 |
|                                                | <i>Thymus vulgaris</i> L.    | Undiluted              | 20  | 50 |
|                                                | <i>Origanum compactum</i> L. | Undiluted              | 20  | 50 |
|                                                | <i>Origanum majorana</i> L.  | Undiluted              | 40  | 50 |
|                                                | <i>Salvia officinalis</i> L. | Undiluted              | 40  | 50 |
|                                                | <i>Salvia sclarea</i> L.     | Undiluted              | 40  | 50 |
| Essential oil constituents<br>(EO constituent) | DL-menthol*                  | 10                     | 5.0 | 50 |
|                                                | thymol*                      | 10                     | 5.0 | 50 |
|                                                | carvacrol                    | Undiluted              | 5.0 | 50 |
|                                                | linalyl acetate              | Undiluted              | 5.0 | 50 |
|                                                | (-)-Terpinen-4-ol            | Undiluted              | 5.0 | 50 |
|                                                | $\alpha,\beta$ - thujone     | Undiluted              | 5.0 | 50 |
| Antibiotic                                     | tetracycline                 | 0.5                    | -   | -  |
| Copper-based commercial pesticide              | copper(I)oxide               | 2.0                    | -   | -  |
| Control                                        | Sterile distilled water      | -                      | -   | -  |

\*10mg/mL – chemical diluted due to solid crystalline structure.

**Table S2.** Chemical profile of commercial essential oils used as antimicrobials. The chromatographic profile of *Mentha x piperita*, *Thymus vulgaris*, *Origanum compactum*, *Origanum majorana* and *Salvia sclarea* were obtained from PRANARÔM international (Belgium), and *Salvia officinalis* from Fagron (Croatia).

| EO constituents                  | Concentration (% peak area) |                        |                           |                          |                           |                       |
|----------------------------------|-----------------------------|------------------------|---------------------------|--------------------------|---------------------------|-----------------------|
|                                  | <i>Mentha x piperita</i>    | <i>Thymus vulgaris</i> | <i>Origanum compactum</i> | <i>Origanum majorana</i> | <i>Salvia officinalis</i> | <i>Salvia sclarea</i> |
| $\alpha$ -pinene                 | 0.91                        | 1.16                   | 0.56                      | 0.72                     | -                         | 0.11                  |
| $\beta$ -pinene                  | 1.08                        | 0.25                   | 0.12                      | -                        | -                         | 0.13                  |
| Sabinene                         | 0.46                        | 0.01                   | -                         | 5.26                     | -                         | 0.03                  |
| Limonene                         | 2.47                        | 0.37                   | 0.22                      | 1.76                     | -                         | 0.62                  |
| 1,8-cineole                      | 5.51                        | 0.05                   | 0.09                      | 0.19                     | 12.9                      | 0.02                  |
| menthone                         | 24.08                       | -                      | -                         | -                        | -                         | -                     |
| menthofurane                     | 2.07                        | -                      | -                         | -                        | -                         | -                     |
| isomenthone                      | 3.64                        | -                      | -                         | -                        | -                         | -                     |
| menthyl acetate                  | 5.48                        | -                      | -                         | -                        | -                         | -                     |
| neomenthol                       | 2.91                        | -                      | -                         | -                        | -                         | -                     |
| $\beta$ -caryophyllene           | 3.05                        | 2.09                   | 1.72                      | -                        | -                         | 1.46                  |
| neoisomenthol                    | 0.61                        | -                      | -                         | -                        | -                         | -                     |
| menthol                          | 36.37                       | -                      | -                         | -                        | -                         | -                     |
| pulegone                         | 1.21                        | -                      | -                         | -                        | -                         | -                     |
| $\alpha$ -terpineol              | 0.55                        | 0.31                   | 0.20                      | 2.90                     | -                         | 2.00                  |
| Germacrene D                     | 1.08                        | -                      | -                         | -                        | -                         | 3.34                  |
| piperitone                       | 1.04                        | -                      | -                         | -                        | -                         | -                     |
| $\alpha$ -thuyene                | 0.06                        | 1.22                   | 0.90                      | 0.70                     | -                         | -                     |
| camphene                         | 0.03                        | 1.15                   | 0.09                      | 0.04                     | -                         | 0.02                  |
| $\beta$ -myrcene                 | 0.23                        | 1.52                   | 1.60                      | 1.80                     | -                         | 0.84                  |
| $\alpha$ -terpinene              | 0.18                        | 1.23                   | 1.64                      | 9.50                     | -                         | 0.01                  |
| $\gamma$ -terpinene              | 0.35                        | 10.05                  | 14.12                     | 15.14                    | -                         | 0.02                  |
| <i>p</i> -cymene                 | 0.18                        | 17.03                  | 7.84                      | 1.45                     | -                         | 0.02                  |
| camphre                          | -                           | 0.66                   | 0.09                      | -                        | 19.0                      | -                     |
| linalool                         | 0.17                        | 4.52                   | 1.38                      | 1.87                     | -                         | -                     |
| linalol                          | -                           | -                      | -                         | -                        | -                         | 18.19                 |
| Terpinene-4-ol                   | 0.64                        | 1.55                   | 0.42                      | 22.54                    | -                         | 0.02                  |
| borneol                          | -                           | 2.07                   | 0.17                      | -                        | 2.8                       | 0.05                  |
| thymol                           | 0.03                        | 45.73                  | 8.21                      | 0.02                     | -                         | -                     |
| carvacrol                        | -                           | 4.10                   | 57.58                     | 0.04                     | -                         | -                     |
| $\beta$ -phellandrene            | -                           | 0.23                   | 0.19                      | 1.88                     | -                         | -                     |
| terpinolene                      | 0.10                        | 0.12                   | 0.08                      | 3.42                     | -                         | 0.14                  |
| Trans-thuyanol                   | 0.24                        | 0.20                   | 0.19                      | 5.32                     | -                         | -                     |
| E-solanone                       | -                           | -                      | -                         | 1.64                     | -                         | -                     |
| Cis-thuyanol                     | 0.04                        | 0.10                   | -                         | 9.01                     | -                         | -                     |
| linalyl acetate                  | -                           | -                      | -                         | 3.75                     | -                         | 62.94                 |
| Trans- <i>p</i> -menth-2-en-1-ol | 0.03                        | 0.03                   | 0.02                      | 1.02                     | -                         | -                     |
| $\beta$ -caryophyllene           | -                           | -                      | -                         | 2.87                     | -                         | 1.46                  |
| Cis- <i>p</i> -menth-2-en-1-ol   | -                           | 0.03                   | 0.02                      | 0.82                     | -                         | -                     |
| bicyclogermacrene                | -                           | -                      | -                         | 1.50                     | -                         | 0.47                  |
| Cis-piperitol                    | -                           | -                      | -                         | 0.55                     | -                         | -                     |
| $\alpha$ -, and $\beta$ -thuyone | -                           | -                      | -                         | -                        | 33.8                      | -                     |
| bornyl acetate                   | -                           | 0.07                   | -                         | 0.06                     | 1.9                       | 0.50                  |
